# Supplementary material for: Evolution of the Mitochondrial Genomes of Gall Midges (Diptera: Cecidomyiidae): Rearrangement and Severe Truncation of tRNA Genes
Source: PubMed Central journal article supplement — Genome Biol Evol. 2009 Aug 3;1:278–87. doi: 10.1093/gbe/evp027 (PMC2817422; doi:10.1093/gbe/evp027), 2009-08-03
Supplement: evp027_1.pdf [file evp027_1.pdf]

**Figure S1.** Alignment of tRNA gene sequences of cecidomyiids.

```

Ala                                     ....      TGC      ....      Arg->
Mayetiola   TTAAAATTAATTTAA-TAAAAAATTTATATTTTGCAAATATAATTTA-----AAAAA
Rhopalomyia ..TTTT.....A.T.....A.....GA.TATTTGATTTTTTTTTTAATAAAAATAATT.TT

Arg                                     ....      TCG      ....      <-Ile
Mayetiola   AAAAAATATATTATAAATTGAATAAATTTAACTTCGAATTAATAAATATATATATAAATTATCAATTTACT
Rhopalomyia TT.TTA...CC...--.A...GG.....ATT...T.TA.A..TG...A.T.T.TA...AATTA
                                     <-Glu

Asn                                     ...      GTT      ....      Nad3->
Mayetiola   AAATTA AAAACCAAAAAGAGGTATATTACTGTTAATAATAACTGATATTATTATAATTATTATATATTTAT
Rhopalomyia .T.AAT.....A.....T..T..G...ATA.-----A.....A..T.

Asp                                     ....      GTC      ....      Atp8->
Mayetiola   AATAAATTAGTTTAAA--AAACATTAATTTGTCAAATTAATTT-----ATTCCTCAAATAAAAC
Rhopalomyia ...T..A.....A.TTTA.T.....ATATAATTTTATATATT.....A.....

Cys                                     ....      GCA      ....      <-Trp
Mayetiola   ATAATCATTTATTAATAAATAATTAATTTGCAAATTTATTTTTTATAAATAAATTTTGAAAATTTATATTTTATTT
Rhopalomyia G...ATT.A...AT...T.....A.---TT.....G...AT.A

Gln                                     ...      TTG      ....
Mayetiola   TAGCTTATTATAATTTTTTTTTGTATAAATAATTTTGAATTATTTGGTAAGATTATGTATATATATAATTTTATA
Rhopalomyia .TAT...A.....T.....AAA.TATA.T.TAT.GCTA.A.A...GAC.A.

Glu                                     ....      TTC      ....
Mayetiola   ATTATATTAGTTTAATAAT-AAAATTTAAAATTTTCAGTTTTATAATTTTAAAATTTTTTTTTTAATACTTATGACTGA
Rhopalomyia TA...TA..A.....T..A.....A.....A...A..A.A.TT.AA..CGAAGT..AA.CCATT.AT

Gly                                     ....      TCC      ....      Asn->
Mayetiola   ATTAATTTAATATAAAAAAATAGTATAAATAATTTCCAATTATAAAGTAAAAAATAAACC AAAAAGAGGTATA
Rhopalomyia .A..TA.....A.....T.....T.AAT.....

His                                     ....      GTG      ....      Nad5->
Mayetiola   TAAATTTTAATTTAA-ACCTAAAATTA AAAATTTGTGAAATTTTAAATAATTA-----ATTTATTTTAT
Rhopalomyia .T.T.A.....-TTT.....TT..T...TTTATTT-----A.A...
Asphondylia A...A.....ATTT.....TT.....AA.....AA.TAAATCTTTTTTTT..A.....A.T.

Ile                                     ...      GAT      ....
Mayetiola   ATACTTATGACTGATAAAAAGTAATAAATTTGATAATTTATATATATATATATTTTATTAATTCGAAGTTAAATTTATTC
Rhopalomyia TATT.A.....C.....A...AT.AAAA..A...GTA..TAAT

Leu (CUN)                               ...      TAG      ....      Nad1->
Mayetiola   TTTTTTATGACAGATTAATTTGTATTAATTTAGAAATTTAATTATTTAATTTGAATATTTTTTTAATTATGTTATTTTT
Rhopalomyia .AA.A.T.....AA..A.....T.....A..TAATT.ATA.A..AATT--.AA...A.A.

Leu (UUR)                               ...      TAA      ....      Cox2->
Mayetiola   AAAAAATTTGTCAGAA-ATAATGAAATGAATTTAAAATTCATATATATAT-ATATACATAATTATTTTTAATTTACAA
Rhopalomyia .TTTTTA.....T.A.T.....T...TA...AAA.TT.AATTTT
Asteromyia  ...TT.A.....-T.....C.....A...AGAA...ATATC.TGATCAAA.TTAAATTTA

```
