# Supplementary material for: Evolution of the Mitochondrial Genomes of Gall Midges (Diptera: Cecidomyiidae): Rearrangement and Severe Truncation of tRNA Genes
Source: PubMed Central journal article supplement — Genome Biol Evol. 2009 Aug 3;1:278–87. doi: 10.1093/gbe/evp027 (PMC2817422; doi:10.1093/gbe/evp027), 2009-08-03

**Figure S4. Inferred secondary structure of sequenced tRNA genes from *Asphondylia rosetta*.**

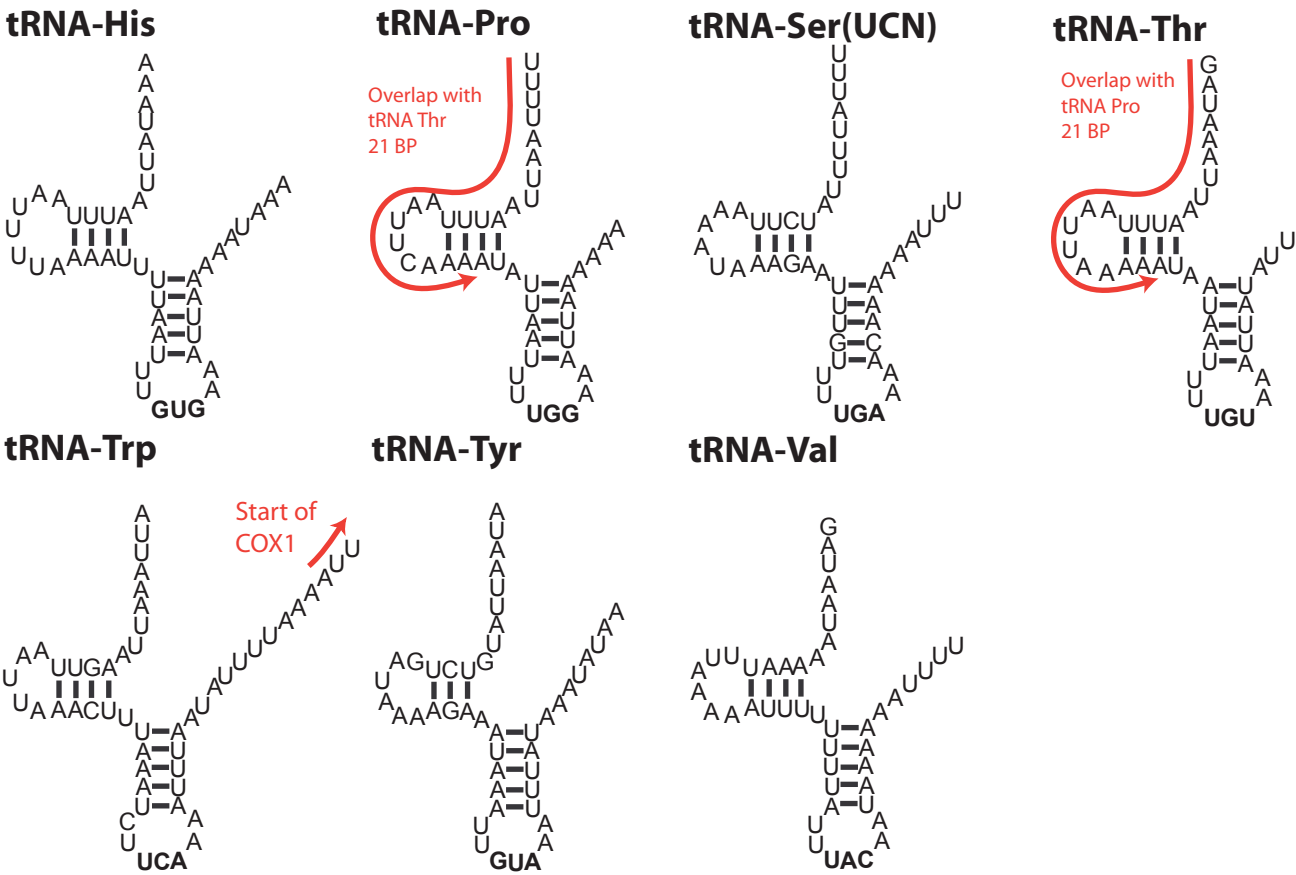

**Figure S4. Inferred secondary structure of sequenced tRNA genes from *A. Asteromyia carbonifera* and *B. Asteromyia euthamiae*.**

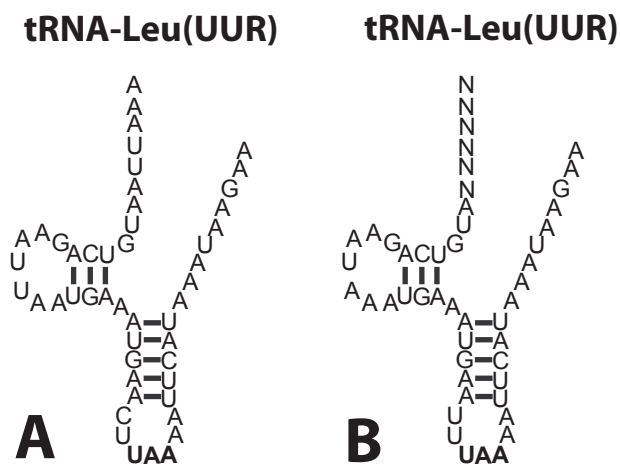

Supplement: evp027_4.pdf [file evp027_4.pdf]
