# Supplementary figures and images for: Evolution of the Mitochondrial Genomes of Gall Midges (Diptera: Cecidomyiidae): Rearrangement and Severe Truncation of tRNA Genes
Source: PubMed Central journal article supplement — Genome Biol Evol. 2009 Aug 3;1:278–87. doi: 10.1093/gbe/evp027 (PMC2817422; doi:10.1093/gbe/evp027), 2009-08-03

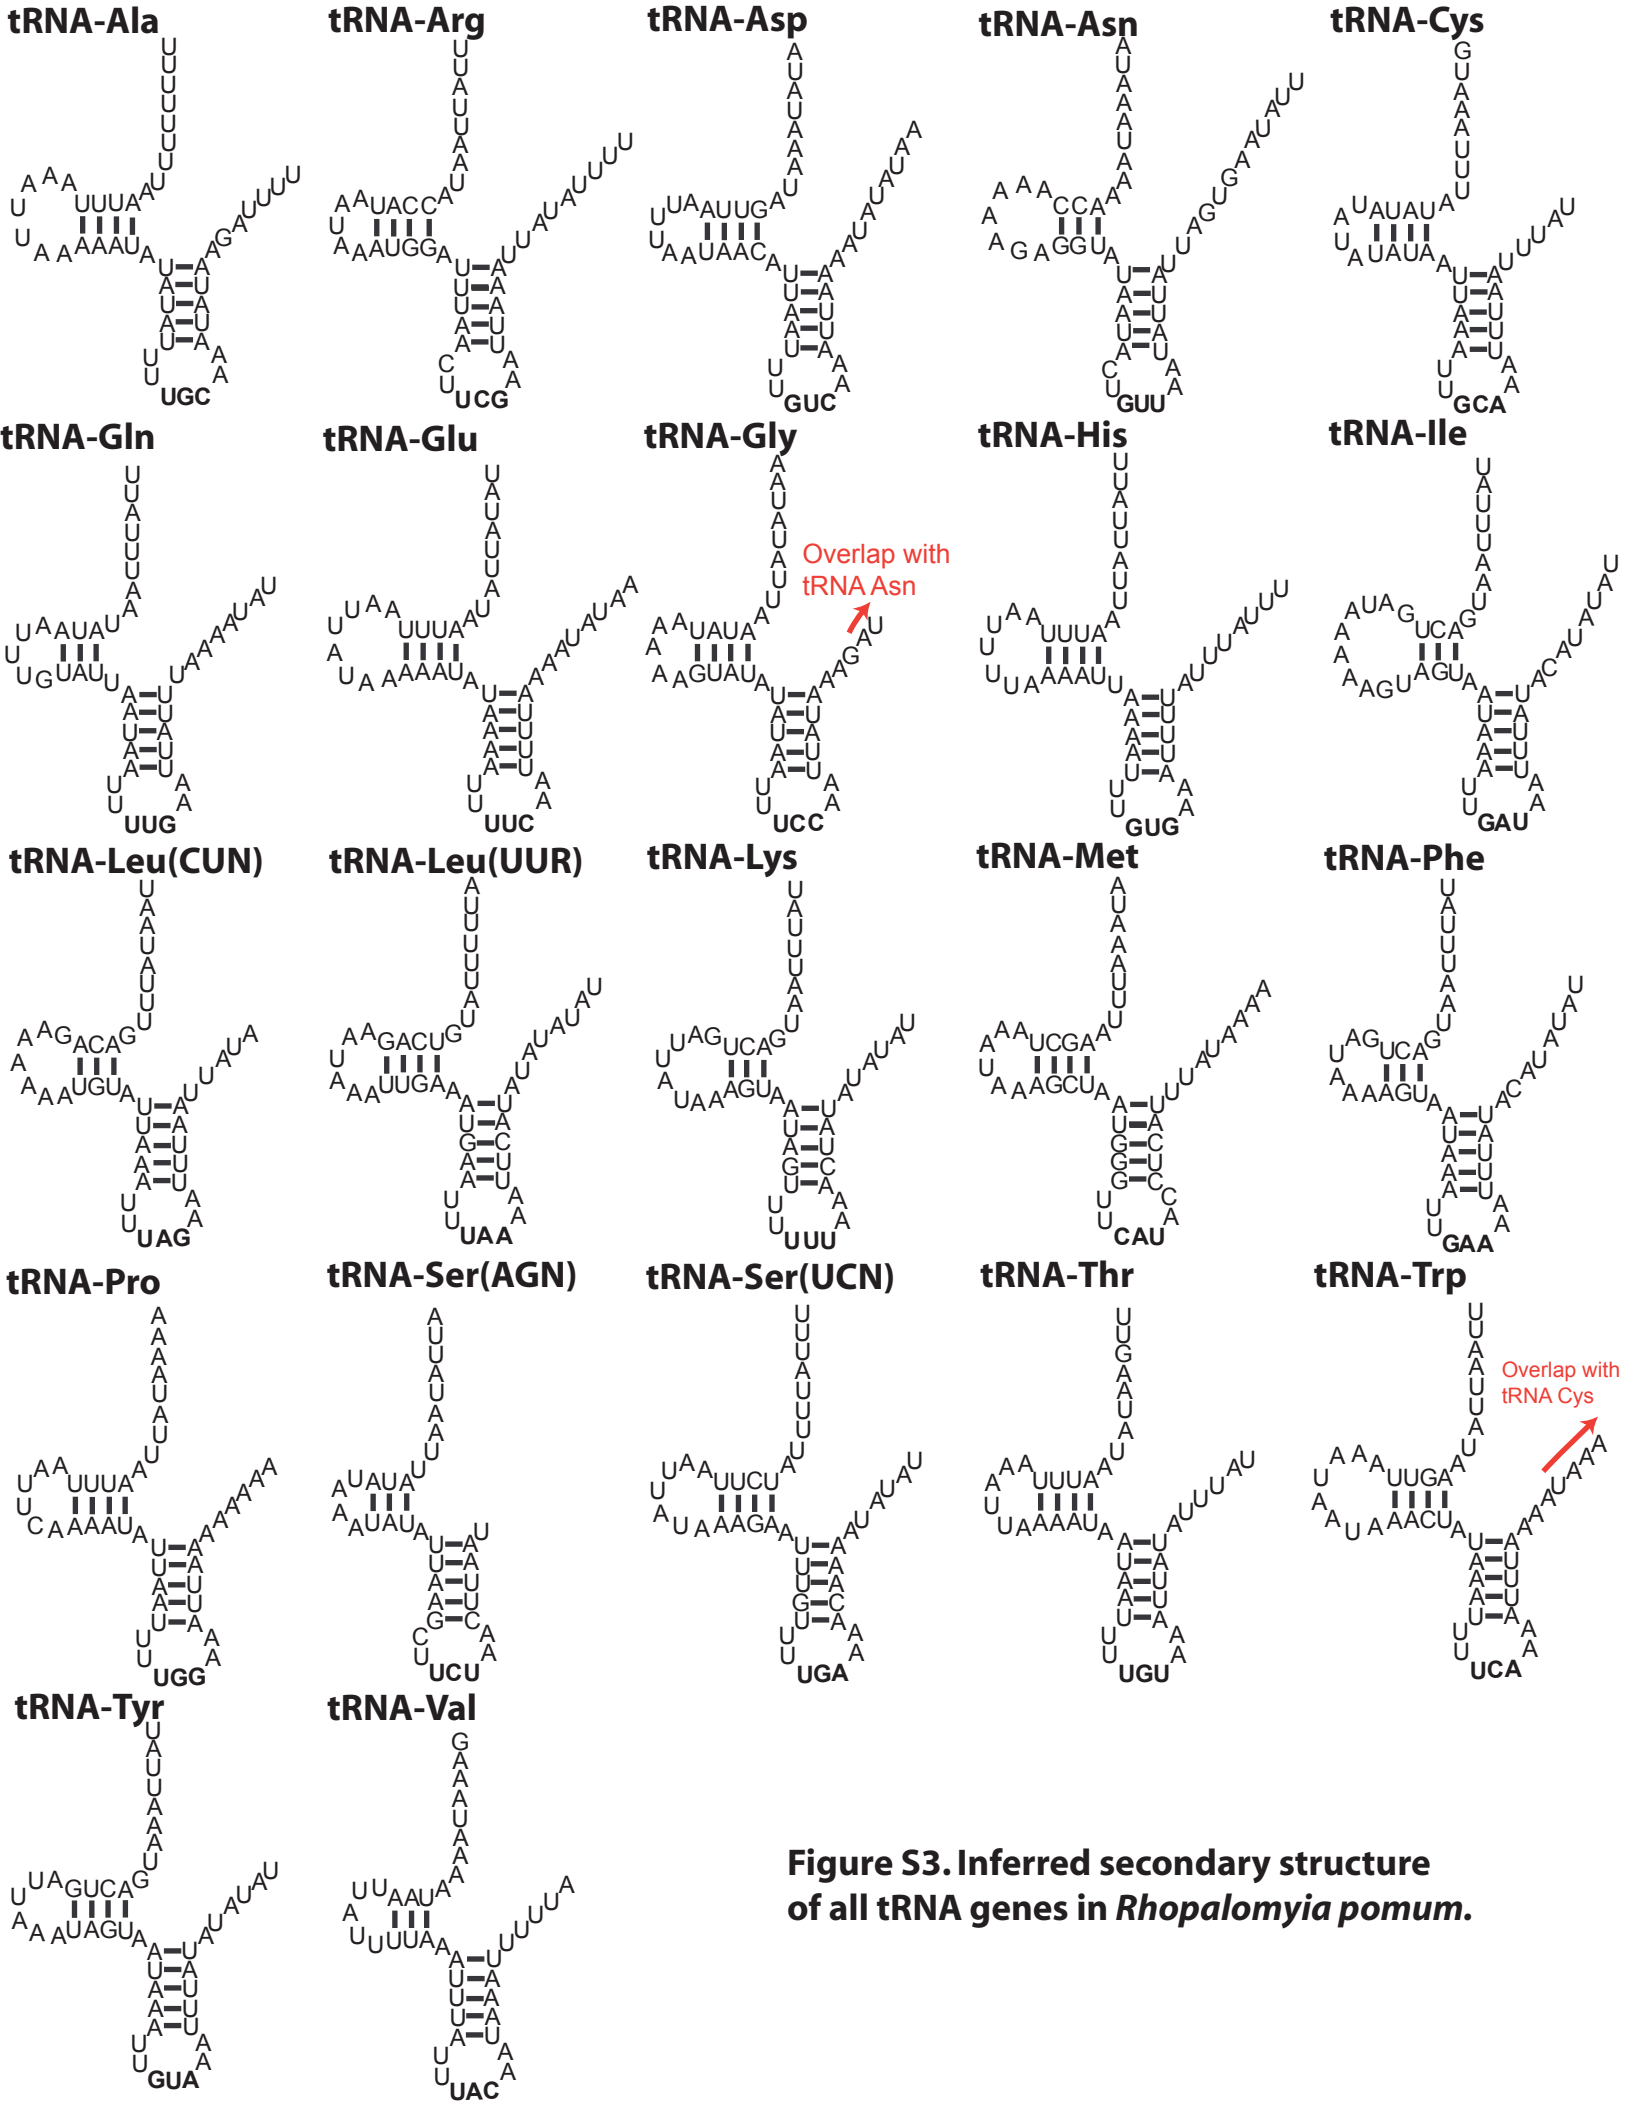

**Figure S3. Inferred secondary structure of all tRNA genes in *Rhopalomyia pomum*.**

Supplement: evp027_3.pdf [file evp027_3.pdf]
